# Supplementary material for: Full-Length Transcriptome Sequencing-Based Analysis of Pinus sylvestris var. mongolica in Response to Sirex noctilio Venom
Source: MDPI journal article supplement (doi:10.3390/insects13040338), 2022-03-30
Supplement: s1 [file s1]

**Table S1.** The quality assessment of the 27 samples.

| Sample  | Concentration<br>(ng/ $\mu$ L) | Total quality<br>( $\mu$ g) | OD260/280 | RIN  |
|---------|--------------------------------|-----------------------------|-----------|------|
| CK1_0h_ | 555.00                         | 16.65                       | 2.11      | 8.30 |
| CK2_0h  | 663.5                          | 23.22                       | 2.09      | 8.30 |
| CK3_0h  | 915.30                         | 32.04                       | 2.06      | 8.30 |
| CK1_24h | 819.90                         | 22.96                       | 2.11      | 7.30 |
| CK2_24h | 765.50                         | 21.43                       | 2.17      | 7.90 |
| CK3_24h | 696.80                         | 19.51                       | 2.08      | 6.70 |
| CK1_72h | 707.70                         | 24.77                       | 2.10      | 7.70 |
| CK2_72h | 766.30                         | 19.16                       | 2.05      | 7.90 |
| CK3_72h | 861.80                         | 30.16                       | 2.06      | 7.80 |
| PI1_0h  | 1087.20                        | 21.74                       | 2.10      | 8.10 |
| PI2_0h  | 857.50                         | 17.15                       | 2.16      | 8.10 |
| PI3_0h  | 1039.30                        | 20.79                       | 2.13      | 8.00 |
| PI1_24h | 601.60                         | 18.05                       | 2.07      | 8.10 |
| PI2_24h | 642.10                         | 19.26                       | 2.09      | 8.20 |
| PI3_24h | 833.00                         | 23.32                       | 2.10      | 7.90 |
| PI1_72h | 836.10                         | 20.90                       | 2.07      | 8.30 |
| PI2_72h | 803.50                         | 20.09                       | 2.05      | 8.40 |
| PI3_72h | 798.10                         | 19.95                       | 2.07      | 8.20 |
| PW_0h   | 424.20                         | 8.48                        | 2.03      | 7.60 |
| PW_0h   | 300.90                         | 6.02                        | 2.08      | 8.00 |
| PW_0h   | 328.20                         | 6.56                        | 2.09      | 8.10 |
| PW_24h  | 1102.20                        | 30.86                       | 2.12      | 7.50 |
| PW_24h  | 472.80                         | 13.24                       | 2.02      | 8.00 |
| PW_24h  | 638.70                         | 19.16                       | 2.10      | 7.40 |
| PW_72h  | 741.40                         | 25.95                       | 2.08      | 8.30 |
| PW_72h  | 534.30                         | 18.70                       | 1.98      | 8.30 |
| PW_72h  | 937.20                         | 32.80                       | 2.05      | 8.40 |
