# Supplementary material for: Full-Length Transcriptome Sequencing-Based Analysis of Pinus sylvestris var. mongolica in Response to Sirex noctilio Venom
Source: MDPI journal article supplement (doi:10.3390/insects13040338), 2022-03-30
Supplement: s1 [file s1]

**Table S2.** Summary of RNA sequencing data from 27 RNA libraries and comparison with full-length unigenes.

| <b>Sample</b> | <b>Clean reads</b> | <b>Mapped reads</b> | <b>Mapped ratio</b> |
|---------------|--------------------|---------------------|---------------------|
| CK1_0h_       | 52048226           | 42655426            | 81.95%              |
| CK2_0h        | 43494680           | 36396150            | 83.68%              |
| CK3_0h        | 47011562           | 38802952            | 82.54%              |
| CK1_24h       | 48012518           | 39414898            | 82.09%              |
| CK2_24h       | 52849158           | 42905310            | 81.18%              |
| CK3_24h       | 47053344           | 39369962            | 83.67%              |
| CK1_72h       | 49928134           | 41076888            | 82.27%              |
| CK2_72h       | 54501374           | 44969844            | 82.51%              |
| CK3_72h       | 44980644           | 38276898            | 85.10%              |
| PI1_0h        | 51511470           | 43028316            | 83.53%              |
| PI2_0h        | 45743680           | 36931666            | 80.74%              |
| PI3_0h        | 47695470           | 39060402            | 81.90%              |
| PI1_24h       | 43949758           | 36986670            | 84.16%              |
| PI2_24h       | 48239756           | 40078062            | 83.08%              |
| PI3_24h       | 50087732           | 40675468            | 81.21%              |
| PI1_72h       | 47275746           | 39077014            | 82.66%              |
| PI2_72h       | 45877602           | 37697492            | 82.17%              |
| PI3_72h       | 47705738           | 39345140            | 82.47%              |
| PW_0h         | 46567316           | 39231330            | 84.25%              |
| PW_0h         | 44760406           | 36931568            | 82.51%              |
| PW_0h         | 46431932           | 38805482            | 83.57%              |
| PW_24h        | 46565662           | 39018804            | 83.79%              |
| PW_24h        | 44655040           | 36934664            | 82.71%              |
| PW_24h        | 45966012           | 38118612            | 82.93%              |
| PW_72h        | 47105604           | 38097180            | 80.88%              |
| PW_72h        | 48583032           | 39044078            | 80.37%              |
| PW_72h        | 52043576           | 43108640            | 82.83%              |
