# Supplementary figures and images for: Full-Length Transcriptome Sequencing-Based Analysis of Pinus sylvestris var. mongolica in Response to Sirex noctilio Venom
Source: MDPI journal article supplement (doi:10.3390/insects13040338), 2022-03-30

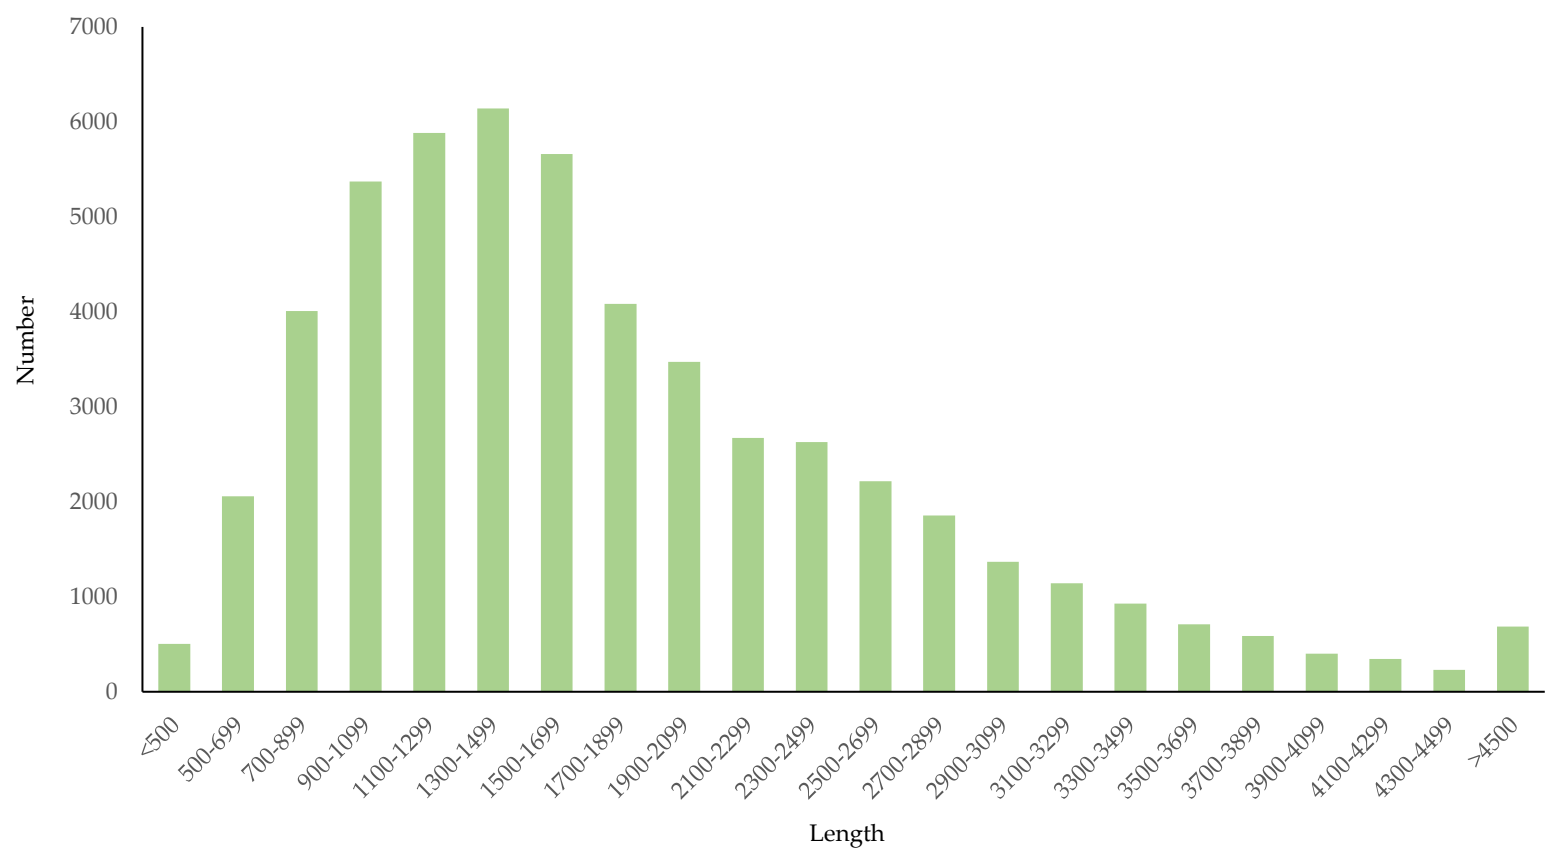

**Figure S1.** The length distribution of unigenes

Supplement: s1 [file s1]

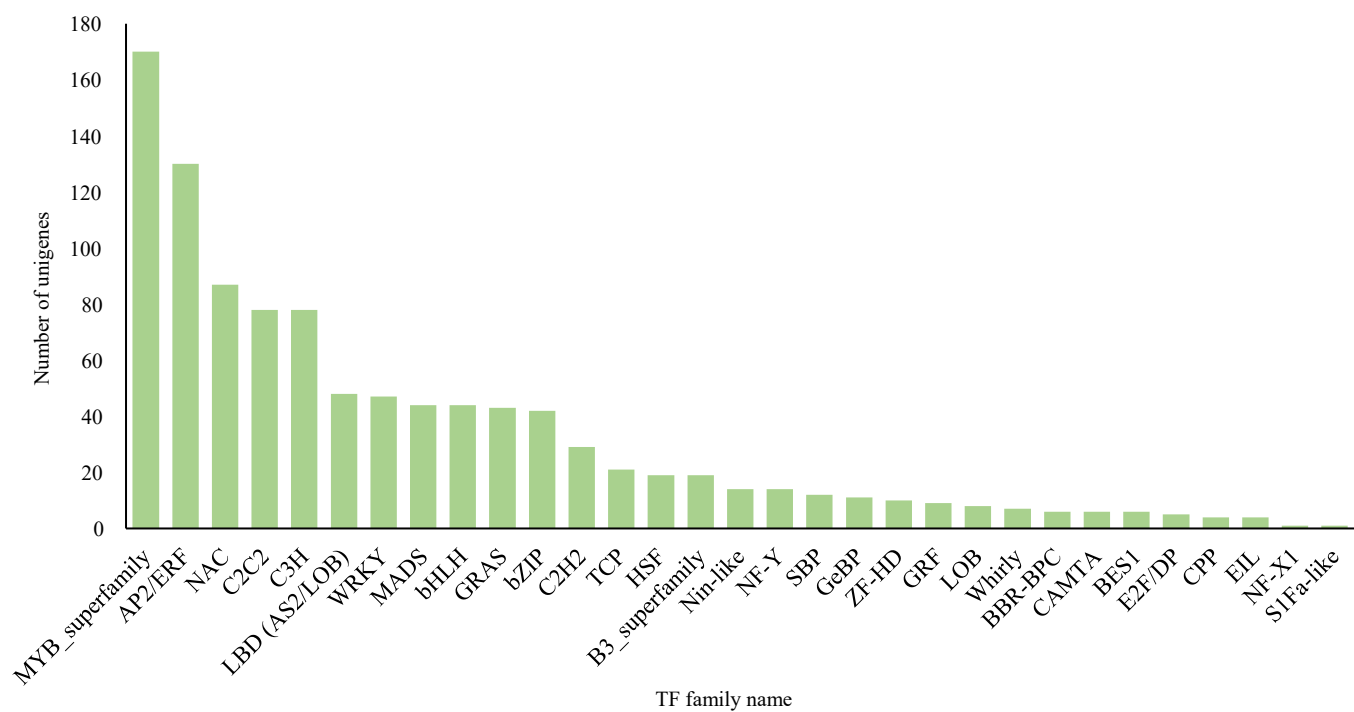

**Figure S2.** Unigene number distribution of TF families

Supplement: s1 [file s1]
